# Supplementary material for: Comparative Analysis of Statistical and Machine Learning Techniques for Rice Yield Forecasting for Chhattisgarh, India
Source: MDPI journal article supplement (doi:10.3390/su15032786), 2023-02-03
Supplement: s1 [file s1]

Table S1: Weight and biases of ANN model developed for Raipur district

| parameter | value   |
|-----------|---------|-----------|---------|-----------|---------|-----------|---------|-----------|---------|-----------|---------|-----------|---------|-----------|---------|
| b->h1     | -0.0356 | b->h2     | -0.0356 | b->h3     | -0.0357 | b->h4     | -0.0356 | b->h5     | -0.0356 | b->h6     | 0.0309  | b->h7     | 0.0308  | b->o      | 0.0083  |
| i1->h1    | 0.3203  | i1->h2    | 0.3203  | i1->h3    | 0.3206  | i1->h4    | 0.3204  | i1->h5    | 0.3206  | i1->h6    | -0.2973 | i1->h7    | -0.2969 | h1->o     | 0.5804  |
| i2->h1    | -0.0256 | i2->h2    | -0.0256 | i2->h3    | -0.0256 | i2->h4    | -0.0256 | i2->h5    | -0.0257 | i2->h6    | 0.0221  | i2->h7    | 0.0220  | h2->o     | 0.5805  |
| i3->h1    | 0.0825  | i3->h2    | 0.0825  | i3->h3    | 0.0825  | i3->h4    | 0.0824  | i3->h5    | 0.0826  | i3->h6    | -0.0766 | i3->h7    | -0.0765 | h3->o     | 0.5811  |
| i4->h1    | 0.0465  | i4->h2    | 0.0466  | i4->h3    | 0.0466  | i4->h4    | 0.0465  | i4->h5    | 0.0466  | i4->h6    | -0.0440 | i4->h7    | -0.0439 | h4->o     | 0.5806  |
| i5->h1    | -0.0381 | i5->h2    | -0.0381 | i5->h3    | -0.0382 | i5->h4    | -0.0381 | i5->h5    | -0.0382 | i5->h6    | 0.0340  | i5->h7    | 0.0339  | h5->o     | 0.5811  |
| i6->h1    | 0.0757  | i6->h2    | 0.0757  | i6->h3    | 0.0758  | i6->h4    | 0.0757  | i6->h5    | 0.0758  | i6->h6    | -0.0711 | i6->h7    | -0.0710 | h6->o     | -0.5334 |
| i7->h1    | -0.0095 | i7->h2    | -0.0095 | i7->h3    | -0.0096 | i7->h4    | -0.0095 | i7->h5    | -0.0095 | i7->h6    | 0.0078  | i7->h7    | 0.0078  | h7->o     | -0.5327 |
| i8->h1    | 0.0123  | i8->h2    | 0.0123  | i8->h3    | 0.0123  | i8->h4    | 0.0123  | i8->h5    | 0.0123  | i8->h6    | -0.0121 | i8->h7    | -0.0121 |           |         |
| i9->h1    | 0.1711  | i9->h2    | 0.1711  | i9->h3    | 0.1713  | i9->h4    | 0.1712  | i9->h5    | 0.1713  | i9->h6    | -0.1591 | i9->h7    | -0.1588 |           |         |
| i10->h1   | -0.1109 | i10->h2   | -0.1109 | i10->h3   | -0.1111 | i10->h4   | -0.1110 | i10->h5   | -0.1111 | i10->h6   | 0.1020  | i10->h7   | 0.1019  |           |         |
| i11->h1   | -0.0361 | i11->h2   | -0.0361 | i11->h3   | -0.0362 | i11->h4   | -0.0362 | i11->h5   | -0.0362 | i11->h6   | 0.0327  | i11->h7   | 0.0327  |           |         |
| i12->h1   | -0.0676 | i12->h2   | -0.0677 | i12->h3   | -0.0677 | i12->h4   | -0.0677 | i12->h5   | -0.0678 | i12->h6   | 0.0615  | i12->h7   | 0.0614  |           |         |
| i13->h1   | 0.0982  | i13->h2   | 0.0982  | i13->h3   | 0.0983  | i13->h4   | 0.0982  | i13->h5   | 0.0983  | i13->h6   | -0.0916 | i13->h7   | -0.0915 |           |         |
| i14->h1   | 0.1011  | i14->h2   | 0.1011  | i14->h3   | 0.1012  | i14->h4   | 0.1012  | i14->h5   | 0.1012  | i14->h6   | -0.0949 | i14->h7   | -0.0948 |           |         |
| i15->h1   | 0.0083  | i15->h2   | 0.0083  | i15->h3   | 0.0082  | i15->h4   | 0.0082  | i15->h5   | 0.0082  | i15->h6   | -0.0084 | i15->h7   | -0.0084 |           |         |
| i16->h1   | 0.0948  | i16->h2   | 0.0948  | i16->h3   | 0.0949  | i16->h4   | 0.0948  | i16->h5   | 0.0949  | i16->h6   | -0.0888 | i16->h7   | -0.0887 |           |         |
| i17->h1   | -0.0048 | i17->h2   | -0.0048 | i17->h3   | -0.0048 | i17->h4   | -0.0048 | i17->h5   | -0.0048 | i17->h6   | 0.0033  | i17->h7   | 0.0033  |           |         |
| i18->h1   | -0.0029 | i18->h2   | -0.0029 | i18->h3   | -0.0030 | i18->h4   | -0.0029 | i18->h5   | -0.0030 | i18->h6   | 0.0012  | i18->h7   | 0.0012  |           |         |
| i19->h1   | 0.0744  | i19->h2   | 0.0744  | i19->h3   | 0.0745  | i19->h4   | 0.0744  | i19->h5   | 0.0745  | i19->h6   | -0.0694 | i19->h7   | -0.0693 |           |         |
| i20->h1   | -0.0779 | i20->h2   | -0.0779 | i20->h3   | -0.0780 | i20->h4   | -0.0780 | i20->h5   | -0.0780 | i20->h6   | 0.0715  | i20->h7   | 0.0714  |           |         |
| i21->h1   | -0.0410 | i21->h2   | -0.0409 | i21->h3   | -0.0410 | i21->h4   | -0.0410 | i21->h5   | -0.0410 | i21->h6   | 0.0370  | i21->h7   | 0.0369  |           |         |
| i22->h1   | -0.0677 | i22->h2   | -0.0678 | i22->h3   | -0.0678 | i22->h4   | -0.0678 | i22->h5   | -0.0679 | i22->h6   | 0.0612  | i22->h7   | 0.0611  |           |         |
| i23->h1   | 0.0873  | i23->h2   | 0.0873  | i23->h3   | 0.0873  | i23->h4   | 0.0872  | i23->h5   | 0.0874  | i23->h6   | -0.0814 | i23->h7   | -0.0813 |           |         |
| i24->h1   | 0.0938  | i24->h2   | 0.0938  | i24->h3   | 0.0938  | i24->h4   | 0.0938  | i24->h5   | 0.0939  | i24->h6   | -0.0878 | i24->h7   | -0.0877 |           |         |
| i25->h1   | -0.0037 | i25->h2   | -0.0037 | i25->h3   | -0.0038 | i25->h4   | -0.0037 | i25->h5   | -0.0037 | i25->h6   | 0.0024  | i25->h7   | 0.0024  |           |         |
| i26->h1   | 0.1097  | i26->h2   | 0.1097  | i26->h3   | 0.1098  | i26->h4   | 0.1097  | i26->h5   | 0.1099  | i26->h6   | -0.1023 | i26->h7   | -0.1021 |           |         |

|         |         |         |         |         |         |         |         |         |         |         |         |         |         |
|---------|---------|---------|---------|---------|---------|---------|---------|---------|---------|---------|---------|---------|---------|
| i27->h1 | 0.0546  | i27->h2 | 0.0546  | i27->h3 | 0.0546  | i27->h4 | 0.0546  | i27->h5 | 0.0546  | i27->h6 | -0.0514 | i27->h7 | -0.0513 |
| i28->h1 | -0.0081 | i28->h2 | -0.0081 | i28->h3 | -0.0082 | i28->h4 | -0.0082 | i28->h5 | -0.0081 | i28->h6 | 0.0069  | i28->h7 | 0.0069  |
| i29->h1 | -0.0206 | i29->h2 | -0.0206 | i29->h3 | -0.0206 | i29->h4 | -0.0206 | i29->h5 | -0.0206 | i29->h6 | 0.0183  | i29->h7 | 0.0183  |
| i30->h1 | -0.0508 | i30->h2 | -0.0508 | i30->h3 | -0.0509 | i30->h4 | -0.0508 | i30->h5 | -0.0509 | i30->h6 | 0.0457  | i30->h7 | 0.0456  |
| i31->h1 | 0.0943  | i31->h2 | 0.0943  | i31->h3 | 0.0944  | i31->h4 | 0.0943  | i31->h5 | 0.0944  | i31->h6 | -0.0879 | i31->h7 | -0.0878 |
| i32->h1 | 0.0835  | i32->h2 | 0.0835  | i32->h3 | 0.0835  | i32->h4 | 0.0835  | i32->h5 | 0.0836  | i32->h6 | -0.0783 | i32->h7 | -0.0782 |
| i33->h1 | -0.0043 | i33->h2 | -0.0043 | i33->h3 | -0.0043 | i33->h4 | -0.0043 | i33->h5 | -0.0043 | i33->h6 | 0.0030  | i33->h7 | 0.0030  |
| i34->h1 | 0.0832  | i34->h2 | 0.0832  | i34->h3 | 0.0833  | i34->h4 | 0.0832  | i34->h5 | 0.0833  | i34->h6 | -0.0780 | i34->h7 | -0.0779 |
| i35->h1 | -0.0068 | i35->h2 | -0.0068 | i35->h3 | -0.0068 | i35->h4 | -0.0068 | i35->h5 | -0.0068 | i35->h6 | 0.0053  | i35->h7 | 0.0053  |
| i36->h1 | 0.0564  | i36->h2 | 0.0564  | i36->h3 | 0.0565  | i36->h4 | 0.0564  | i36->h5 | 0.0565  | i36->h6 | -0.0534 | i36->h7 | -0.0533 |
| i37->h1 | 0.0394  | i37->h2 | 0.0394  | i37->h3 | 0.0394  | i37->h4 | 0.0394  | i37->h5 | 0.0394  | i37->h6 | -0.0382 | i37->h7 | -0.0382 |
| i38->h1 | -0.0689 | i38->h2 | -0.0689 | i38->h3 | -0.0691 | i38->h4 | -0.0690 | i38->h5 | -0.0690 | i38->h6 | 0.0631  | i38->h7 | 0.0631  |
| i39->h1 | -0.0138 | i39->h2 | -0.0138 | i39->h3 | -0.0139 | i39->h4 | -0.0139 | i39->h5 | -0.0139 | i39->h6 | 0.0119  | i39->h7 | 0.0119  |
| i40->h1 | -0.0682 | i40->h2 | -0.0683 | i40->h3 | -0.0683 | i40->h4 | -0.0683 | i40->h5 | -0.0684 | i40->h6 | 0.0619  | i40->h7 | 0.0618  |
| i41->h1 | 0.0967  | i41->h2 | 0.0967  | i41->h3 | 0.0968  | i41->h4 | 0.0967  | i41->h5 | 0.0968  | i41->h6 | -0.0902 | i41->h7 | -0.0901 |
| i42->h1 | -0.1080 | i42->h2 | -0.1080 | i42->h3 | -0.1082 | i42->h4 | -0.1081 | i42->h5 | -0.1082 | i42->h6 | 0.0990  | i42->h7 | 0.0989  |
| i43->h1 | 0.0597  | i43->h2 | 0.0597  | i43->h3 | 0.0597  | i43->h4 | 0.0597  | i43->h5 | 0.0598  | i43->h6 | -0.0561 | i43->h7 | -0.0561 |

Table S2: Weight and biases of ANN model developed for Surguja district

| parameter | value   | parameter | value   | parameter | value   | parameter | value   |
|-----------|---------|-----------|---------|-----------|---------|-----------|---------|
| b->h1     | -0.0776 | b->h2     | -0.0776 | b->h3     | -0.0776 | b->o      | -0.0102 |
| i1->h1    | 0.3770  | i1->h2    | 0.3770  | i1->h3    | 0.3769  | h1->o     | 0.7083  |
| i2->h1    | -0.0059 | i2->h2    | -0.0059 | i2->h3    | -0.0059 | h2->o     | 0.7083  |
| i3->h1    | -0.0138 | i3->h2    | -0.0138 | i3->h3    | -0.0138 | h3->o     | 0.7082  |
| i4->h1    | -0.0763 | i4->h2    | -0.0763 | i4->h3    | -0.0763 |           |         |
| i5->h1    | -0.0527 | i5->h2    | -0.0527 | i5->h3    | -0.0527 |           |         |
| i6->h1    | -0.0482 | i6->h2    | -0.0482 | i6->h3    | -0.0482 |           |         |
| i7->h1    | 0.1391  | i7->h2    | 0.1391  | i7->h3    | 0.1390  |           |         |
| i8->h1    | 0.1613  | i8->h2    | 0.1612  | i8->h3    | 0.1612  |           |         |
| i9->h1    | 0.1456  | i9->h2    | 0.1456  | i9->h3    | 0.1456  |           |         |
| i10->h1   | -0.0667 | i10->h2   | -0.0667 | i10->h3   | -0.0667 |           |         |
| i11->h1   | 0.0645  | i11->h2   | 0.0645  | i11->h3   | 0.0645  |           |         |
| i12->h1   | -0.0952 | i12->h2   | -0.0952 | i12->h3   | -0.0952 |           |         |
| i13->h1   | 0.0672  | i13->h2   | 0.0672  | i13->h3   | 0.0672  |           |         |
| i14->h1   | -0.0414 | i14->h2   | -0.0414 | i14->h3   | -0.0414 |           |         |
| i15->h1   | -0.0020 | i15->h2   | -0.0020 | i15->h3   | -0.0020 |           |         |
| i16->h1   | -0.0323 | i16->h2   | -0.0323 | i16->h3   | -0.0323 |           |         |
| i17->h1   | 0.1563  | i17->h2   | 0.1563  | i17->h3   | 0.1563  |           |         |
| i18->h1   | 0.0952  | i18->h2   | 0.0952  | i18->h3   | 0.0952  |           |         |
| i19->h1   | -0.1033 | i19->h2   | -0.1033 | i19->h3   | -0.1032 |           |         |
| i20->h1   | -0.0936 | i20->h2   | -0.0936 | i20->h3   | -0.0936 |           |         |
| i21->h1   | 0.0838  | i21->h2   | 0.0838  | i21->h3   | 0.0838  |           |         |
| i22->h1   | -0.0781 | i22->h2   | -0.0781 | i22->h3   | -0.0781 |           |         |
| i23->h1   | 0.0616  | i23->h2   | 0.0616  | i23->h3   | 0.0616  |           |         |
| i24->h1   | -0.0540 | i24->h2   | -0.0540 | i24->h3   | -0.0540 |           |         |
| i25->h1   | 0.1145  | i25->h2   | 0.1145  | i25->h3   | 0.1145  |           |         |
| i26->h1   | 0.0085  | i26->h2   | 0.0085  | i26->h3   | 0.0085  |           |         |
| i27->h1   | -0.0130 | i27->h2   | -0.0129 | i27->h3   | -0.0129 |           |         |
| i28->h1   | -0.1083 | i28->h2   | -0.1082 | i28->h3   | -0.1082 |           |         |
| i29->h1   | -0.0186 | i29->h2   | -0.0185 | i29->h3   | -0.0186 |           |         |
| i30->h1   | -0.0894 | i30->h2   | -0.0894 | i30->h3   | -0.0894 |           |         |
| i31->h1   | 0.0853  | i31->h2   | 0.0853  | i31->h3   | 0.0853  |           |         |
| i32->h1   | -0.0266 | i32->h2   | -0.0265 | i32->h3   | -0.0265 |           |         |
| i33->h1   | 0.1428  | i33->h2   | 0.1428  | i33->h3   | 0.1427  |           |         |
| i34->h1   | -0.0521 | i34->h2   | -0.0521 | i34->h3   | -0.0521 |           |         |
| i35->h1   | 0.1343  | i35->h2   | 0.1343  | i35->h3   | 0.1343  |           |         |
| i36->h1   | -0.0305 | i36->h2   | -0.0305 | i36->h3   | -0.0305 |           |         |
| i37->h1   | 0.0178  | i37->h2   | 0.0178  | i37->h3   | 0.0178  |           |         |
| i38->h1   | 0.0125  | i38->h2   | 0.0125  | i38->h3   | 0.0125  |           |         |
| i39->h1   | 0.0952  | i39->h2   | 0.0952  | i39->h3   | 0.0952  |           |         |
| i40->h1   | -0.0527 | i40->h2   | -0.0527 | i40->h3   | -0.0527 |           |         |
| i41->h1   | 0.0621  | i41->h2   | 0.0621  | i41->h3   | 0.0621  |           |         |
| i42->h1   | -0.1238 | i42->h2   | -0.1238 | i42->h3   | -0.1238 |           |         |

i43->h1                      0.0650    i43->h2                      0.0651    i43->h3                      0.0651

Table S3: Weight and biases of ANN model developed for Bastar district

| parameter | value   | parameter | value   | parameter | value   | parameter | value  |
|-----------|---------|-----------|---------|-----------|---------|-----------|--------|
| b->h1     | -0.0049 | b->h2     | -0.0049 | b->h3     | -0.0049 | b->o      | 0.1764 |
| i1->h1    | 0.1792  | i1->h2    | 0.1792  | i1->h3    | 0.1792  | h1->o     | 0.5868 |
| i2->h1    | -0.0217 | i2->h2    | -0.0217 | i2->h3    | -0.0217 | h2->o     | 0.5868 |
| i3->h1    | 0.0486  | i3->h2    | 0.0487  | i3->h3    | 0.0487  | h3->o     | 0.5868 |
| i4->h1    | -0.0185 | i4->h2    | -0.0185 | i4->h3    | -0.0185 |           |        |
| i5->h1    | -0.0230 | i5->h2    | -0.0230 | i5->h3    | -0.0230 |           |        |
| i6->h1    | 0.0231  | i6->h2    | 0.0231  | i6->h3    | 0.0231  |           |        |
| i7->h1    | 0.0067  | i7->h2    | 0.0067  | i7->h3    | 0.0067  |           |        |
| i8->h1    | 0.0521  | i8->h2    | 0.0521  | i8->h3    | 0.0521  |           |        |
| i9->h1    | 0.0499  | i9->h2    | 0.0499  | i9->h3    | 0.0499  |           |        |
| i10->h1   | -0.0176 | i10->h2   | -0.0176 | i10->h3   | -0.0176 |           |        |
| i11->h1   | -0.0081 | i11->h2   | -0.0081 | i11->h3   | -0.0081 |           |        |
| i12->h1   | -0.1335 | i12->h2   | -0.1335 | i12->h3   | -0.1335 |           |        |
| i13->h1   | 0.1350  | i13->h2   | 0.1350  | i13->h3   | 0.1350  |           |        |
| i14->h1   | -0.0168 | i14->h2   | -0.0168 | i14->h3   | -0.0168 |           |        |
| i15->h1   | -0.0027 | i15->h2   | -0.0027 | i15->h3   | -0.0027 |           |        |
| i16->h1   | 0.0232  | i16->h2   | 0.0232  | i16->h3   | 0.0232  |           |        |
| i17->h1   | 0.0015  | i17->h2   | 0.0015  | i17->h3   | 0.0015  |           |        |
| i18->h1   | 0.0454  | i18->h2   | 0.0454  | i18->h3   | 0.0454  |           |        |
| i19->h1   | 0.0635  | i19->h2   | 0.0635  | i19->h3   | 0.0635  |           |        |
| i20->h1   | -0.0303 | i20->h2   | -0.0303 | i20->h3   | -0.0303 |           |        |
| i21->h1   | -0.0172 | i21->h2   | -0.0172 | i21->h3   | -0.0172 |           |        |
| i22->h1   | -0.1644 | i22->h2   | -0.1644 | i22->h3   | -0.1644 |           |        |
| i23->h1   | 0.1295  | i23->h2   | 0.1295  | i23->h3   | 0.1295  |           |        |
| i24->h1   | 0.0245  | i24->h2   | 0.0245  | i24->h3   | 0.0245  |           |        |
| i25->h1   | 0.0092  | i25->h2   | 0.0092  | i25->h3   | 0.0092  |           |        |
| i26->h1   | 0.0378  | i26->h2   | 0.0378  | i26->h3   | 0.0378  |           |        |
| i27->h1   | 0.0268  | i27->h2   | 0.0268  | i27->h3   | 0.0268  |           |        |
| i28->h1   | -0.0263 | i28->h2   | -0.0263 | i28->h3   | -0.0263 |           |        |
| i29->h1   | -0.0187 | i29->h2   | -0.0187 | i29->h3   | -0.0187 |           |        |
| i30->h1   | -0.1719 | i30->h2   | -0.1719 | i30->h3   | -0.1719 |           |        |
| i31->h1   | 0.1625  | i31->h2   | 0.1626  | i31->h3   | 0.1626  |           |        |
| i32->h1   | 0.0360  | i32->h2   | 0.0360  | i32->h3   | 0.0360  |           |        |
| i33->h1   | 0.0099  | i33->h2   | 0.0099  | i33->h3   | 0.0099  |           |        |
| i34->h1   | 0.0187  | i34->h2   | 0.0187  | i34->h3   | 0.0187  |           |        |
| i35->h1   | -0.0035 | i35->h2   | -0.0035 | i35->h3   | -0.0035 |           |        |
| i36->h1   | -0.0683 | i36->h2   | -0.0683 | i36->h3   | -0.0683 |           |        |
| i37->h1   | -0.0440 | i37->h2   | -0.0440 | i37->h3   | -0.0440 |           |        |
| i38->h1   | 0.0151  | i38->h2   | 0.0151  | i38->h3   | 0.0151  |           |        |
| i39->h1   | 0.0166  | i39->h2   | 0.0166  | i39->h3   | 0.0167  |           |        |
| i40->h1   | -0.1362 | i40->h2   | -0.1363 | i40->h3   | -0.1362 |           |        |
| i41->h1   | 0.1433  | i41->h2   | 0.1433  | i41->h3   | 0.1433  |           |        |

|         |         |         |         |         |         |
|---------|---------|---------|---------|---------|---------|
| i42->h1 | -0.1315 | i42->h2 | -0.1316 | i42->h3 | -0.1315 |
| i43->h1 | 0.0996  | i43->h2 | 0.0996  | i43->h3 | 0.0996  |

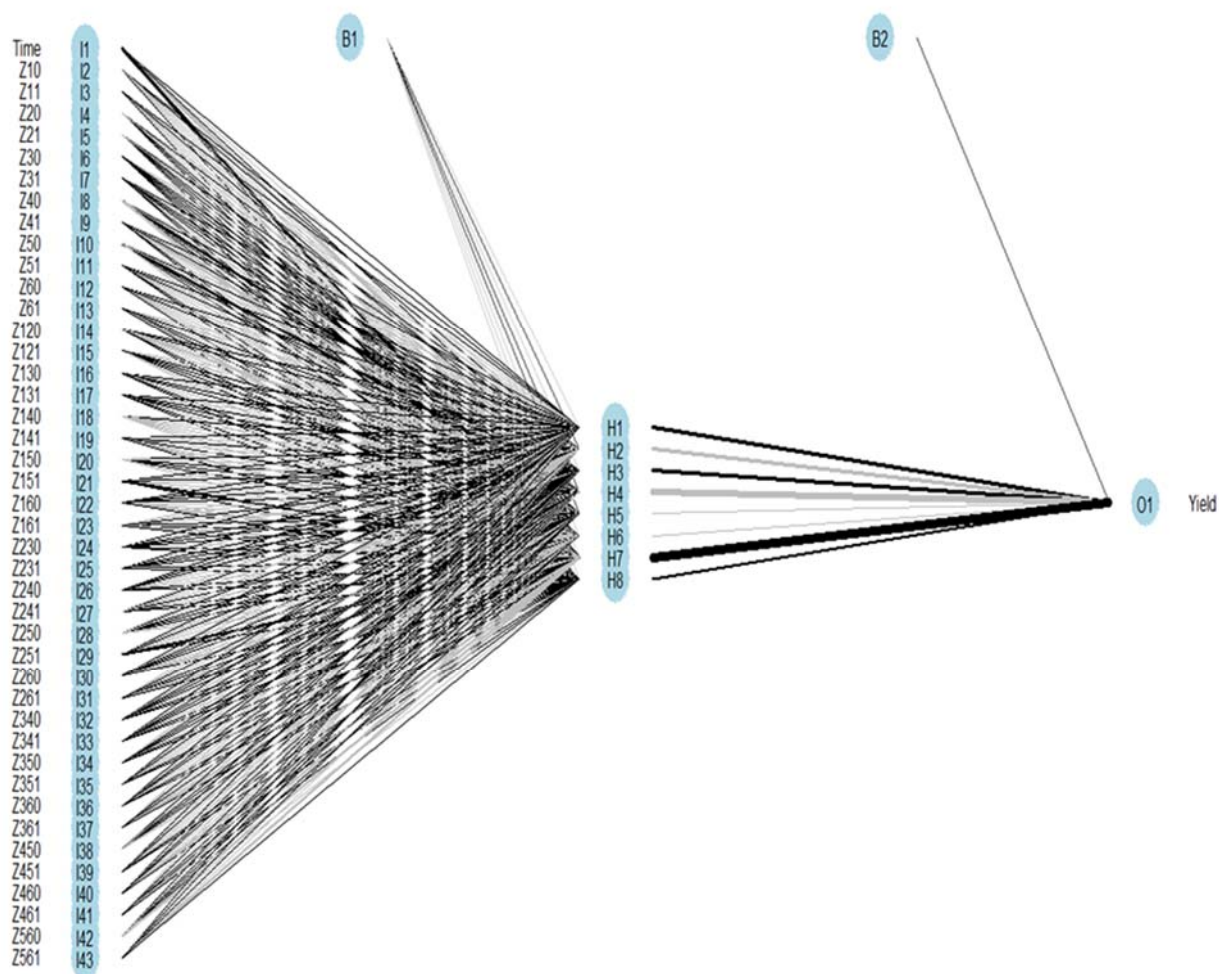

Figure S1. Structure of neural network for rice yield prediction of Raipur

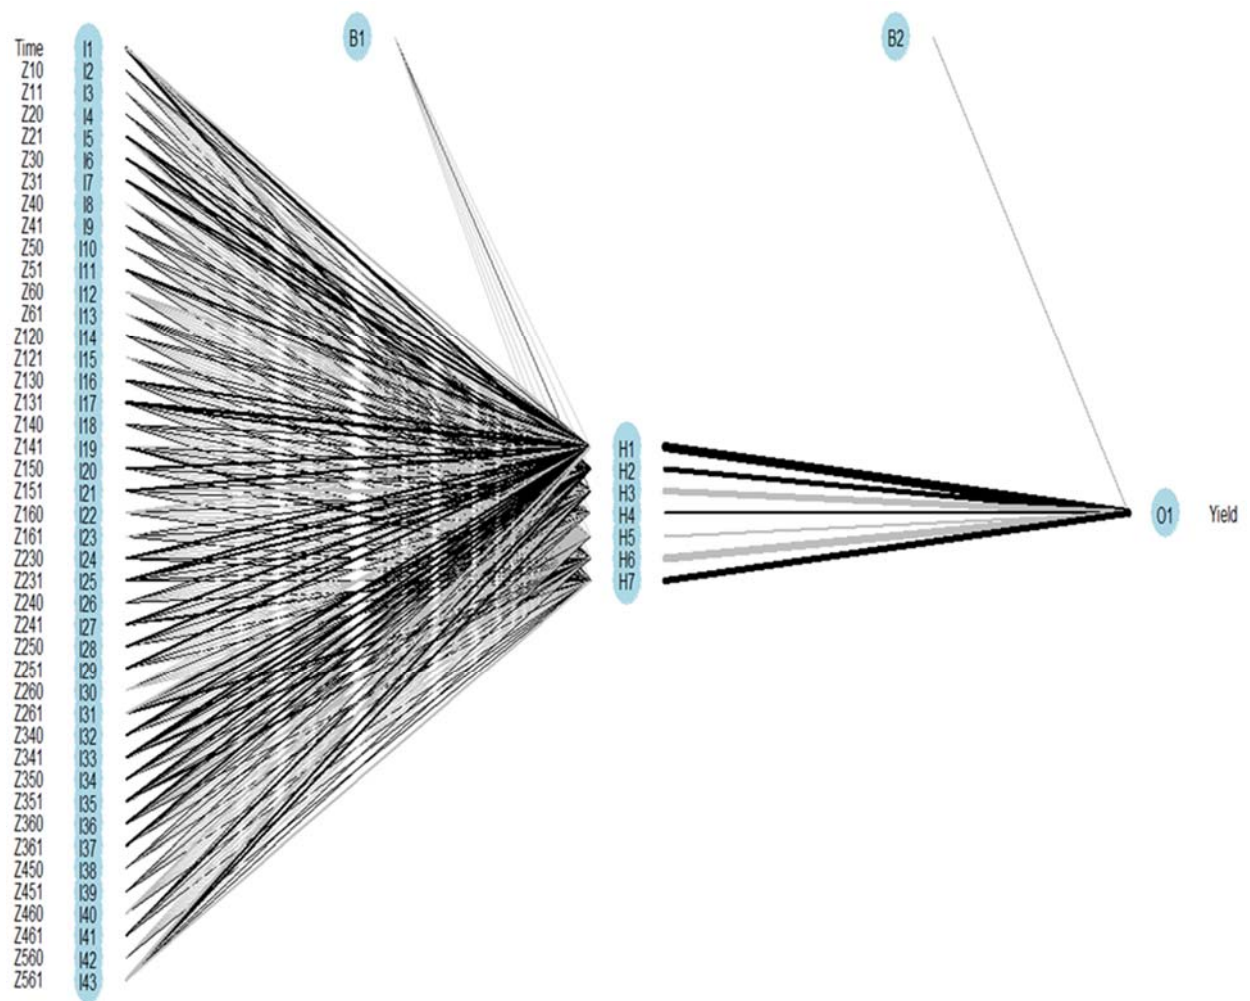

Figure S2. Structure of neural network for rice yield prediction of Surguja

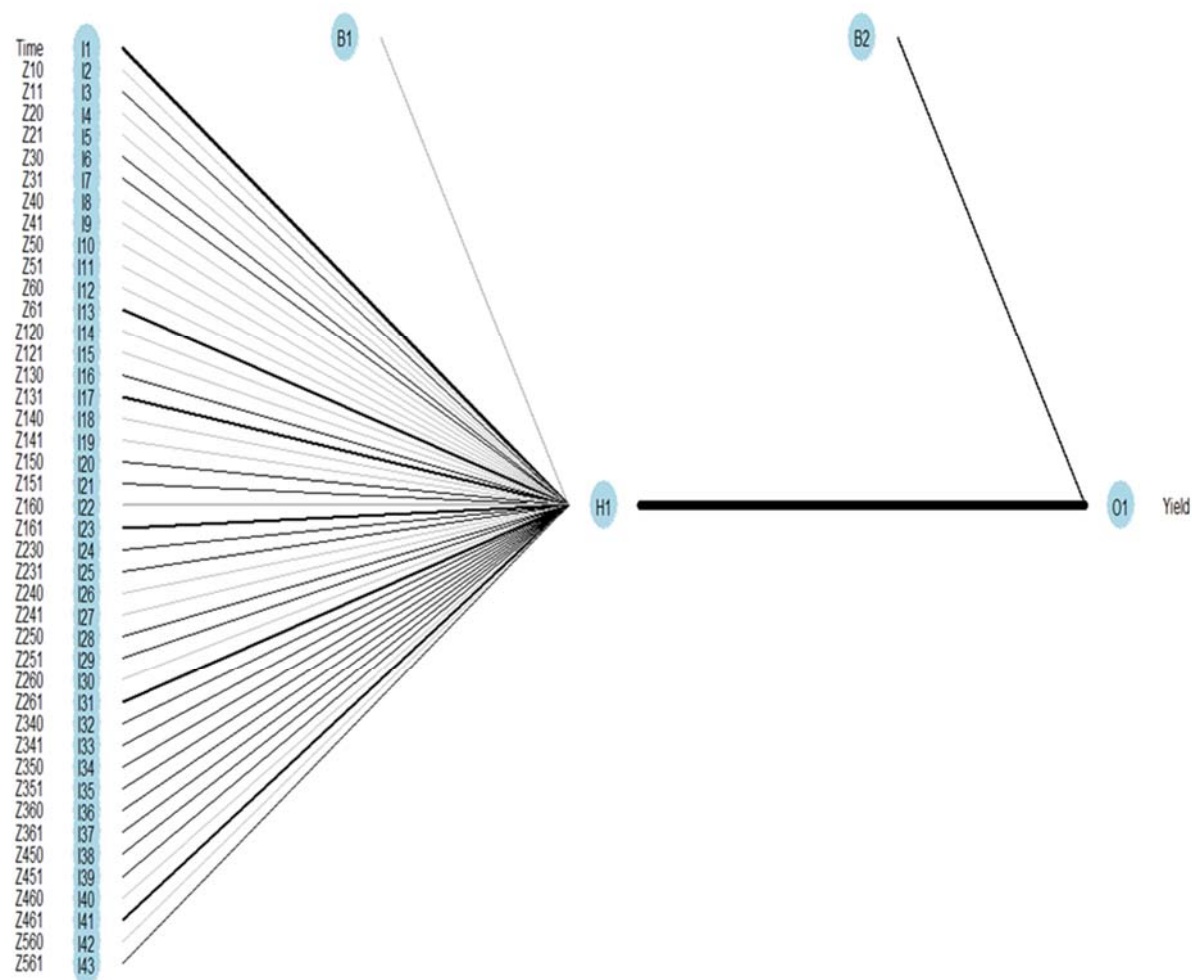

Figure S3. Structure of neural network for rice yield prediction of Bastar
